# Supplementary material
Source: PubMed Central journal article supplement (PMC2978961)
Supplement: mmc1.pdf [file mmc1.pdf]

The American Journal of Human Genetics, Volume 87

## Supplemental Data

To Identify Associations with Rare Variants,

**Just WHaIT: *Weighted Haplotype and Imputation-Based Tests***

Yun Li, Andrea E. Byrnes, and Mingyao Li

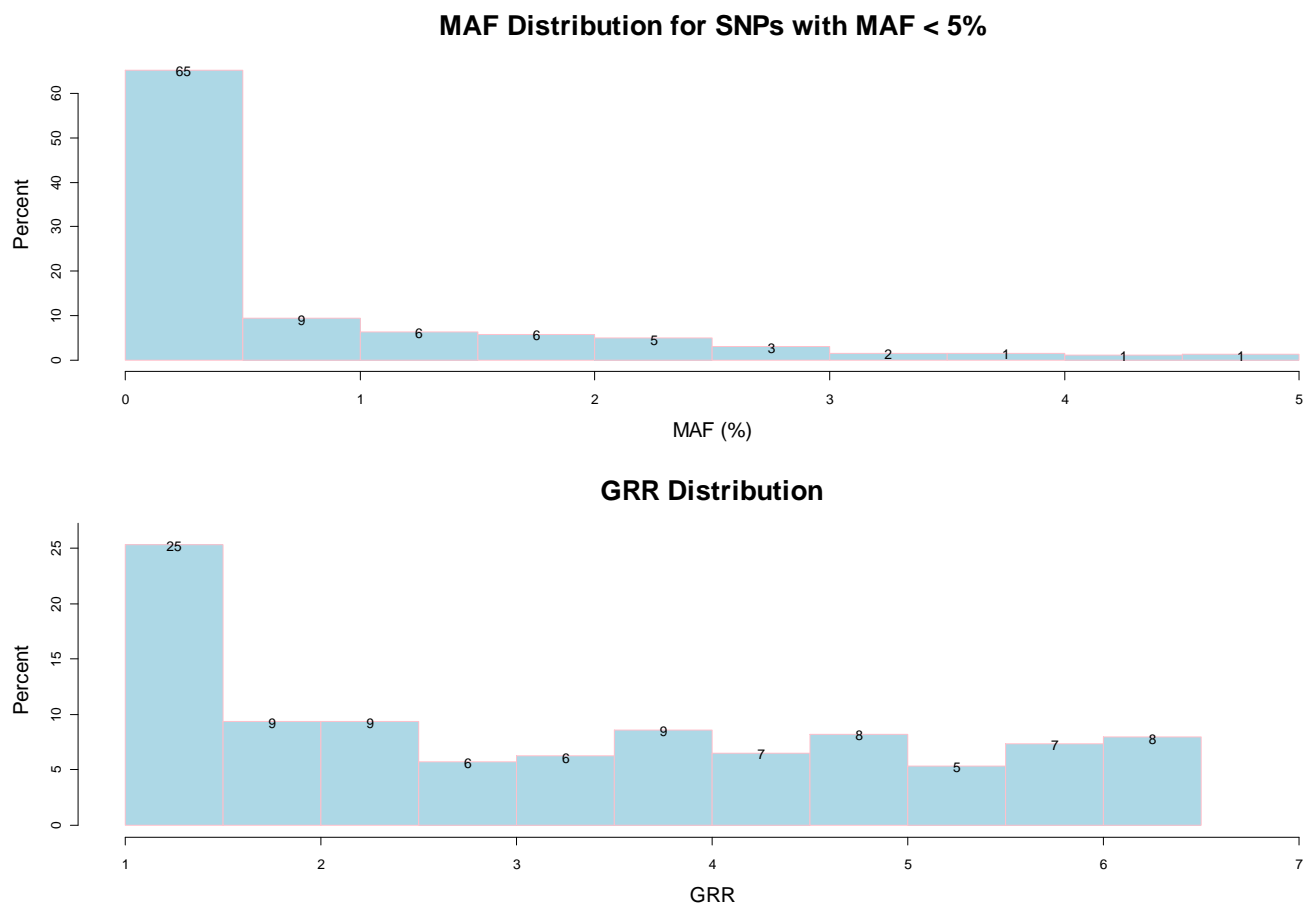

**Figure S1. MAF and GRR Distribution for Simulated Rare Variants (MAF < 5%)**

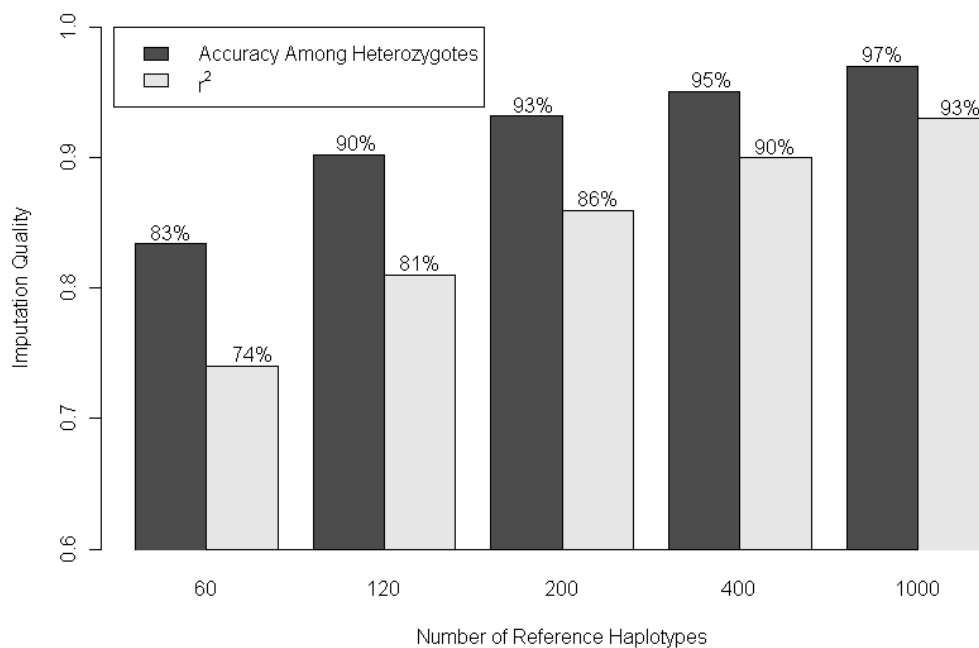

### Figure S2. Imputation Quality for Rare Variants (FUSION Data)

We constructed a set of 1,000 reference haplotypes encompassing both common ( $MAF \geq 5\%$ ) and rare ( $MAF < 5\%$ ) SNPs using 500 FUSION individuals. We masked and imputed genotypes at rare ( $MAF < 5\%$ ) SNPs for an independent set of 500 FUSION individuals using a subset of 60, 120, 200, 400, or the full set of 1,000 haplotypes. We calculated two measures of imputation quality by comparing imputed genotypes with their mask experimental counterparts: allelic accuracy among the heterozygous genotypes, and  $r^2$ .  $r^2$  is defined as the squared correlation between imputed genotype dosages (ranging from 0 to 2) and the experimental dosages (taking values 0, 1, or 2).
